# Supplementary material for: Ab initio study on the decomposition of first excited state HOOO radicals
Source: Royal Society of Chemistry journal article supplement (doi:10.1039/b612045h), 2006-11-15
Supplement: b612045h.pdf [file b612045h.pdf]

Table 1. Geometries<sup>a</sup> of the cis and trans isomers of the HOOO radical.

| Species                    | R(O1-O2) | R(O2-O3) | R(O3-H) | $\theta$ (O1-O2-O3) | $\theta$ (O2-O3-H) | Method                                  |
|----------------------------|----------|----------|---------|---------------------|--------------------|-----------------------------------------|
| cis( <sup>2</sup> A' )     | 1.450    | 1.518    | 0.979   | 101.6               | 101.7              | CASSCF(19,13) <sup>b</sup> /6-31+G(d,p) |
|                            | 1.424    | 1.484    | 0.974   | 101.7               | 102.6              | QCISD/6-31G(d,p) <sup>c</sup>           |
|                            | 1.347    | 1.504    | 0.953   | 103.8               | 103.3              | MRCI <sup>d</sup> /6-31+G(d,p)          |
| trans( <sup>2</sup> A' )   | 1.454    | 1.513    | 0.976   | 98.6                | 96.1               | CASSCF(19,13) <sup>b</sup> /6-31+G(d,p) |
|                            | 1.426    | 1.478    | 0.970   | 99.4                | 96.8               | QCISD/6-31G(d,p) <sup>c</sup>           |
|                            | 1.347    | 1.499    | 0.951   | 100.6               | 97.5               | MRCI <sup>d</sup> /6-31+G(d,p)          |
| cis-TS( <sup>2</sup> A' )  | 1.365    | 1.698    | 0.982   | 101.8               | 99.3               | CASSCF(19,13) <sup>b</sup> /6-31+G(d,p) |
|                            | 1.294    | 1.678    | 0.955   | 103.4               | 100.3              | MRCI <sup>d</sup> /6-31+G(d,p)          |
| tran-TS( <sup>2</sup> A' ) | 1.362    | 1.712    | 0.979   | 101.7               | 92.0               | CASSCF(19,13) <sup>b</sup> /6-31+G(d,p) |
|                            | 1.288    | 1.696    | 0.953   | 101.7               | 93.3               | MRCI <sup>d</sup> /6-31+G(d,p)          |
| trans( <sup>2</sup> A' )   | 1.225    | 1.688    | 0.972   | 111.0               | 90.0               | Expt <sup>e</sup>                       |

<sup>a</sup> Bond lengths are given in Å and angles in degree. <sup>b</sup> The CASSCF calculations are performed with all 19 valence electrons seeded in all the 13 valence orbitals. <sup>c</sup> From ref 11. <sup>d</sup> The active space of MRCI is generated by distributing 9 electrons into 8 valence orbitals. <sup>e</sup> From ref 27.
